# Supplementary material for: Perturbation of Autophagy by a Beclin 1-Targeting Stapled Peptide Induces Mitochondria Stress and Inhibits Proliferation of Pancreatic Cancer Cells
Source: MDPI journal article supplement (doi:10.3390/cancers15030953), 2023-02-02

Figure 1B (repeat 3 times)

Trial 1

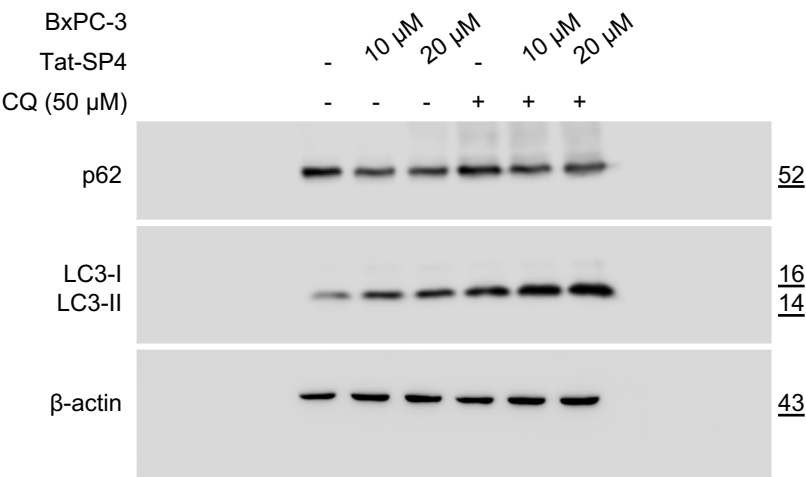

Trial 2

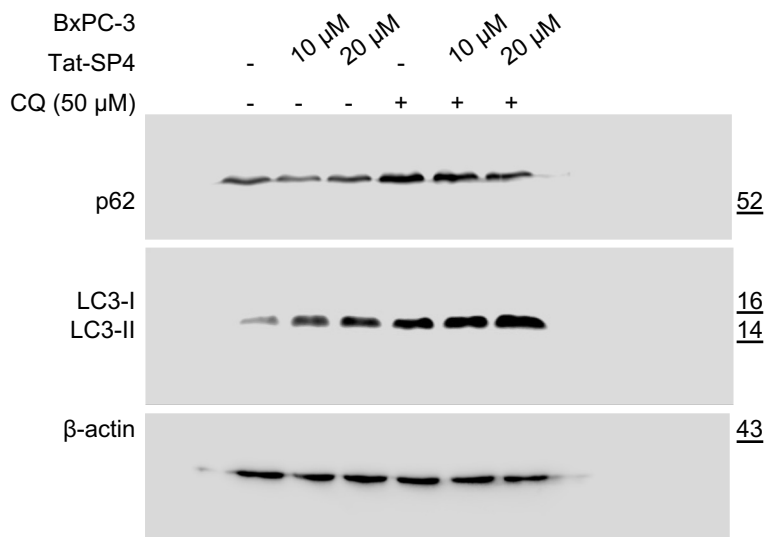

Trial 3

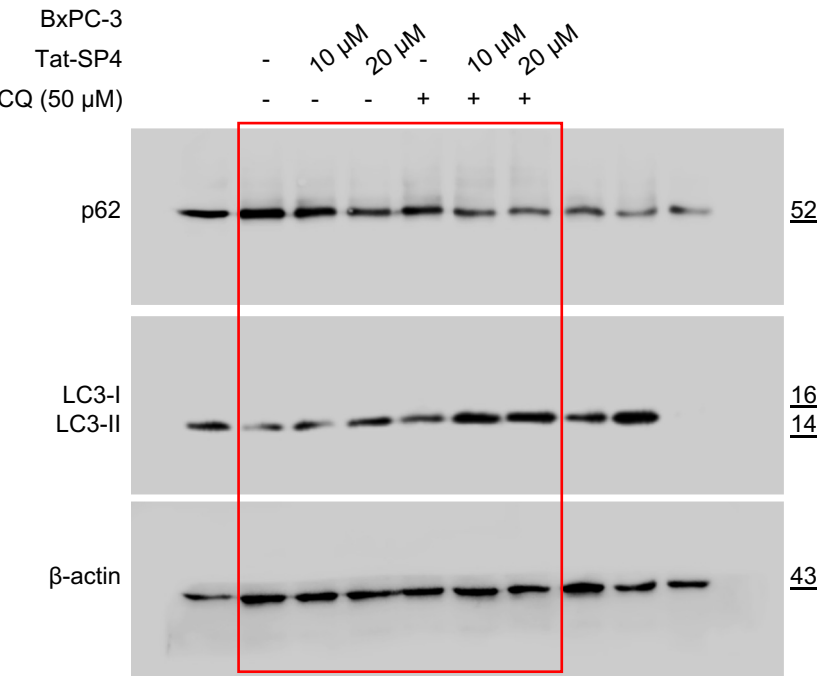

Figure 1D (repeat 3 times)

Trial 1

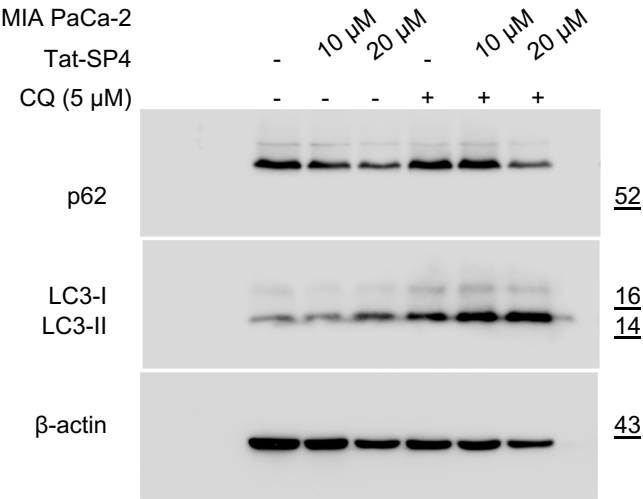

Trial 2

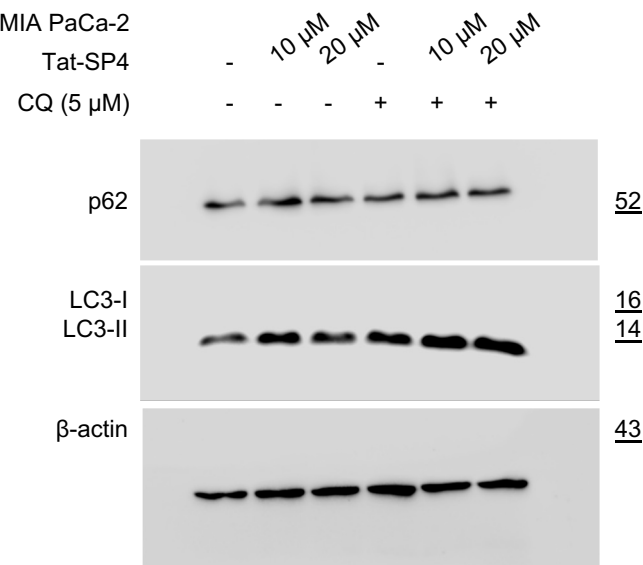

Trial 3

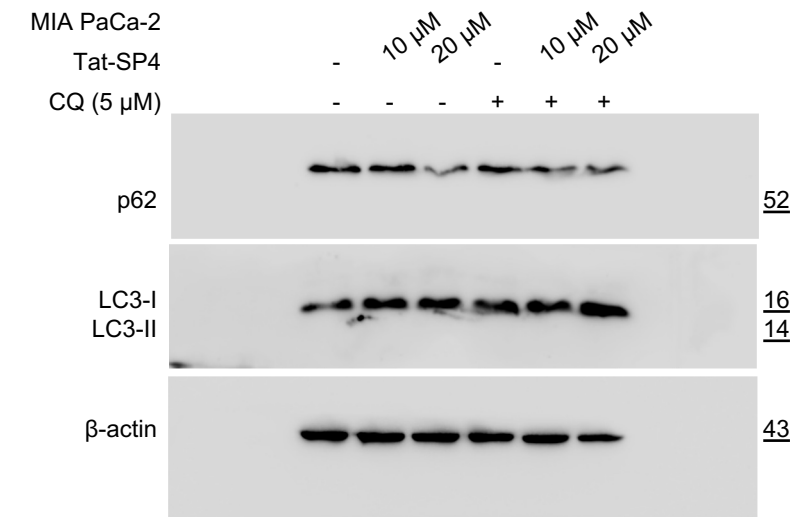

Figure 1F (repeat 3 times)

Trial 1

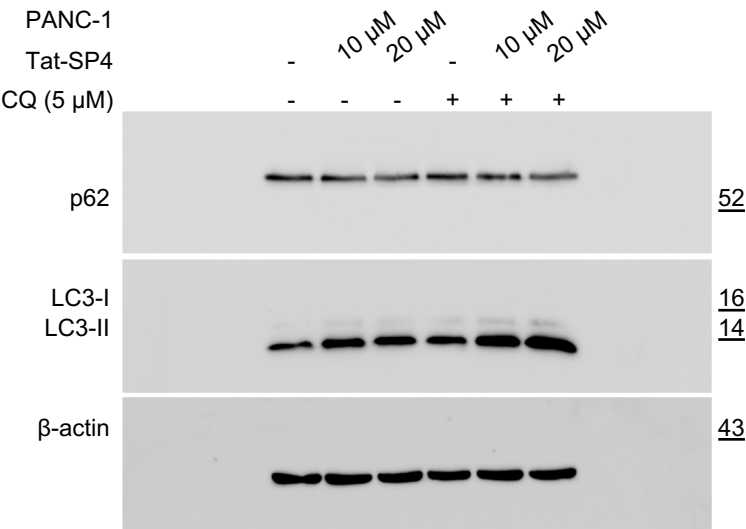

Trial 2

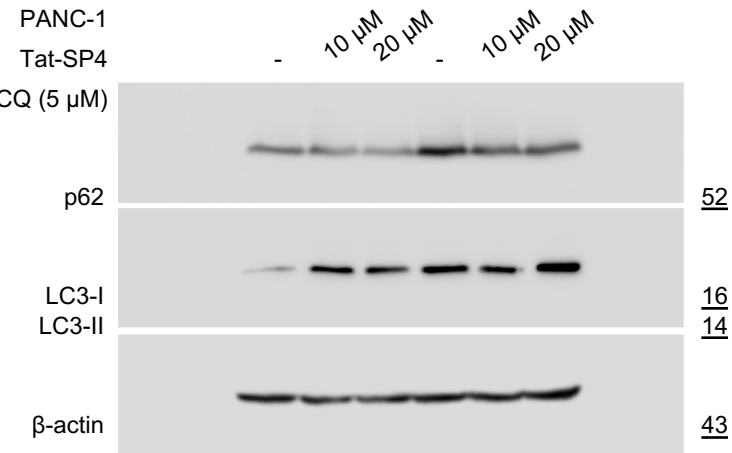

Trial 3

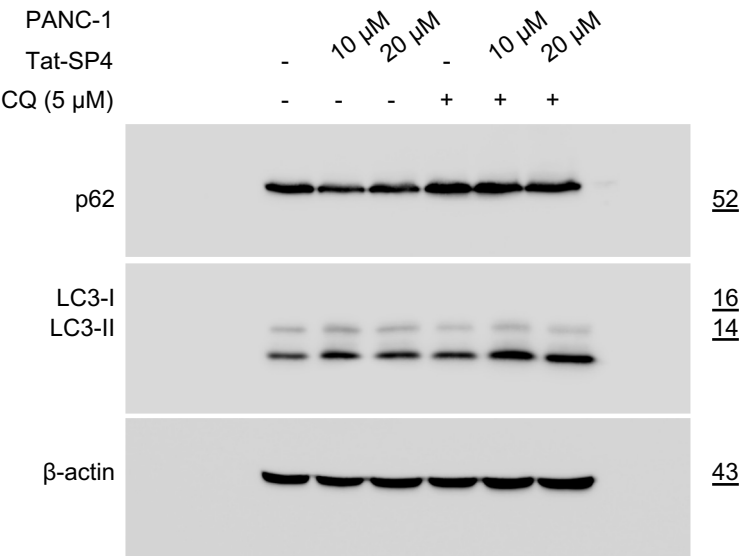

Figure 2A (repeat 3 times)

Trial 1

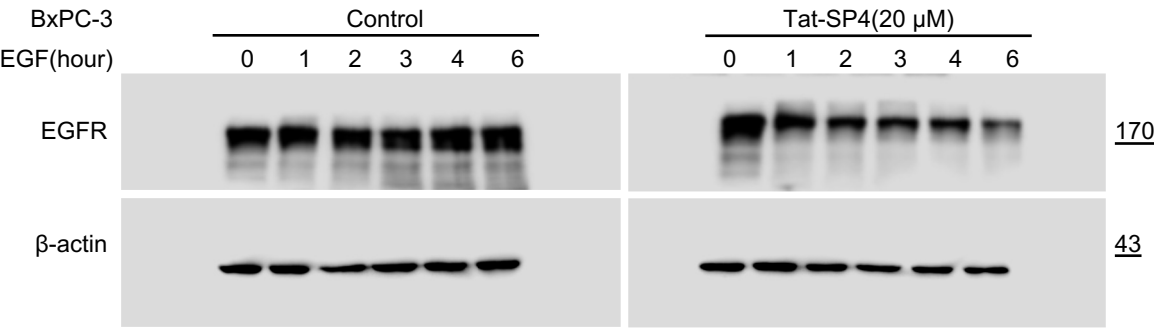

Trial 2

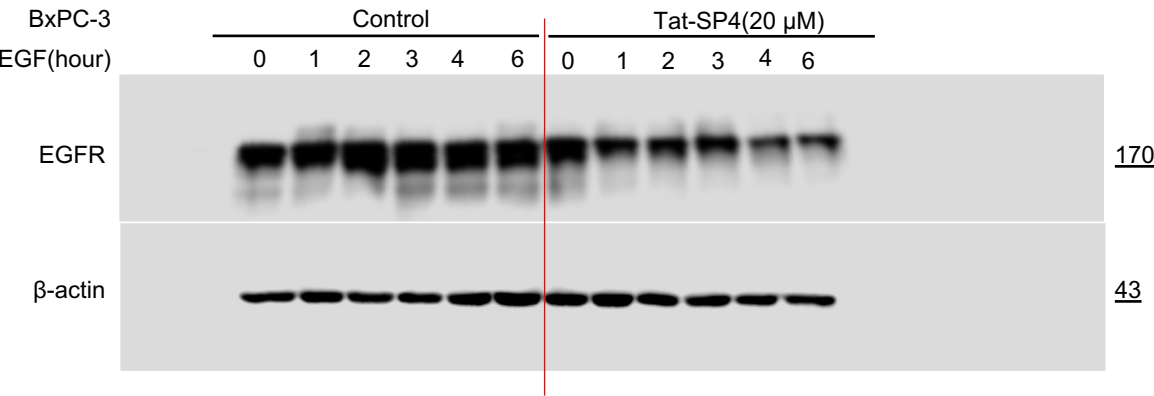

Trial 3

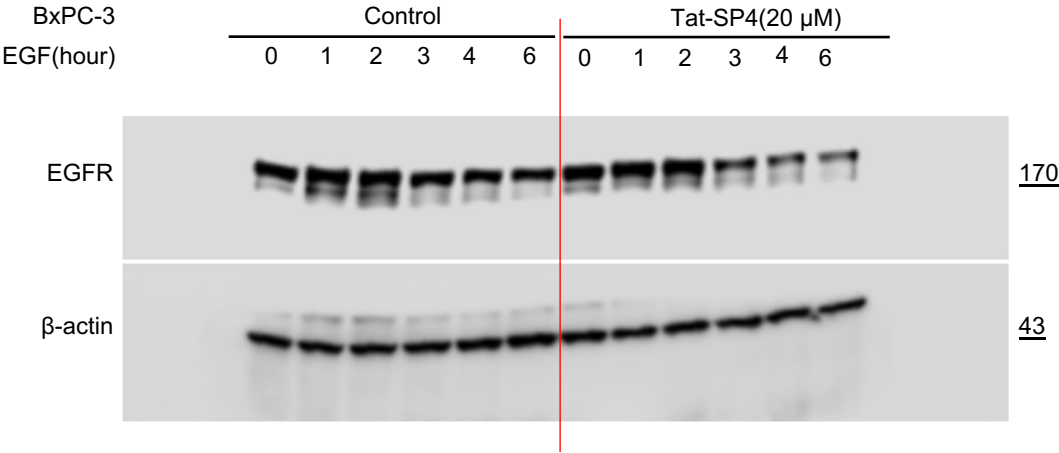

Figure 2C (repeat 3 times)

Trial 1

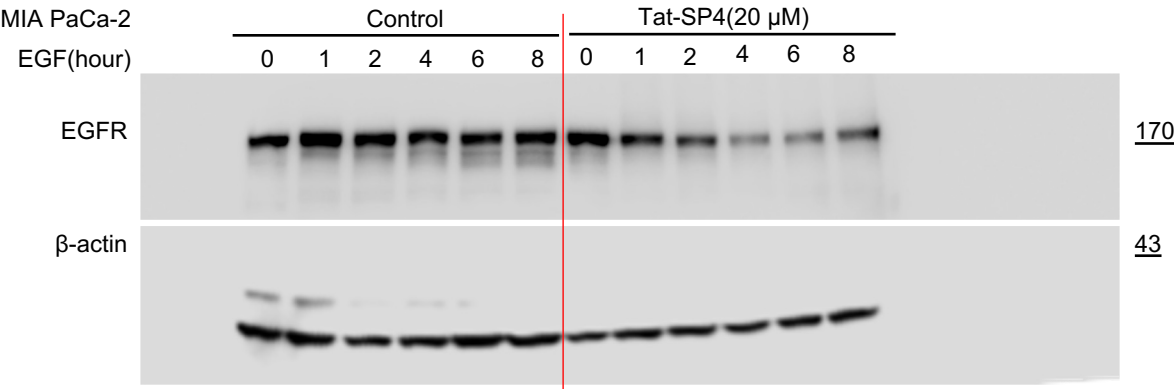

Trial 2

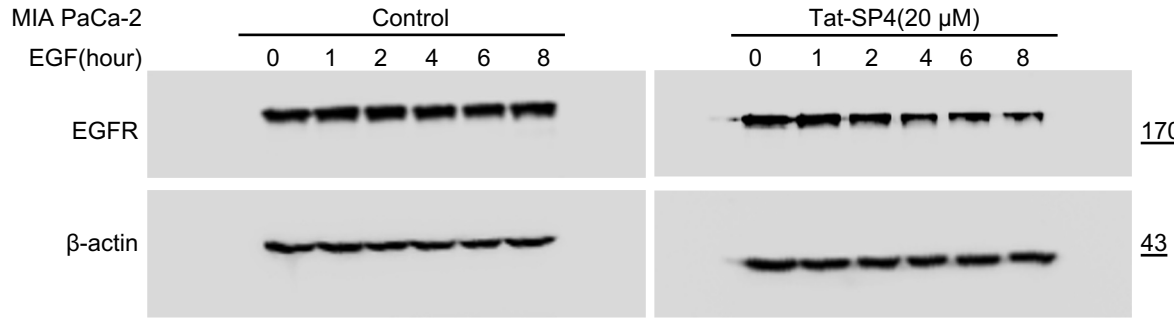

Trial 3

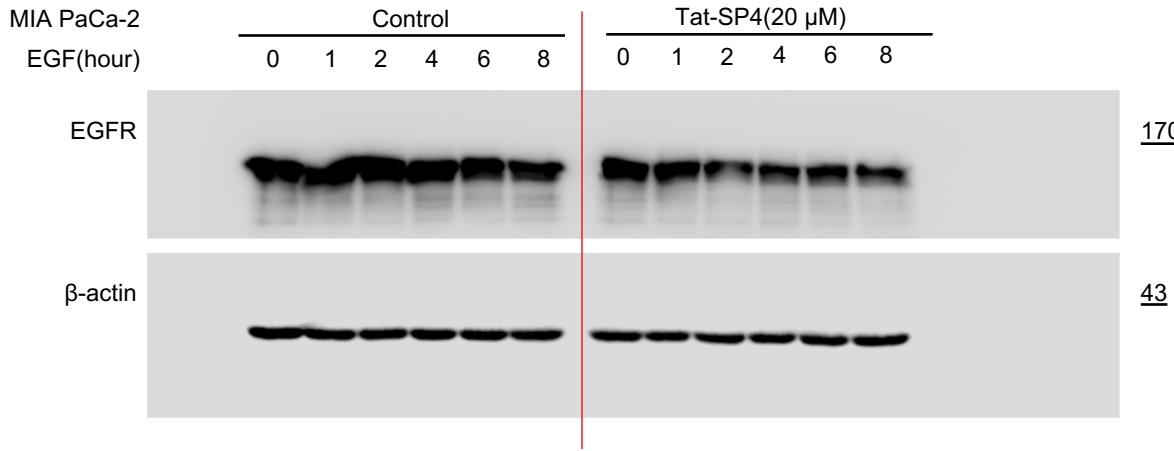

Figure 2E (repeat 3 times)

Trial 1

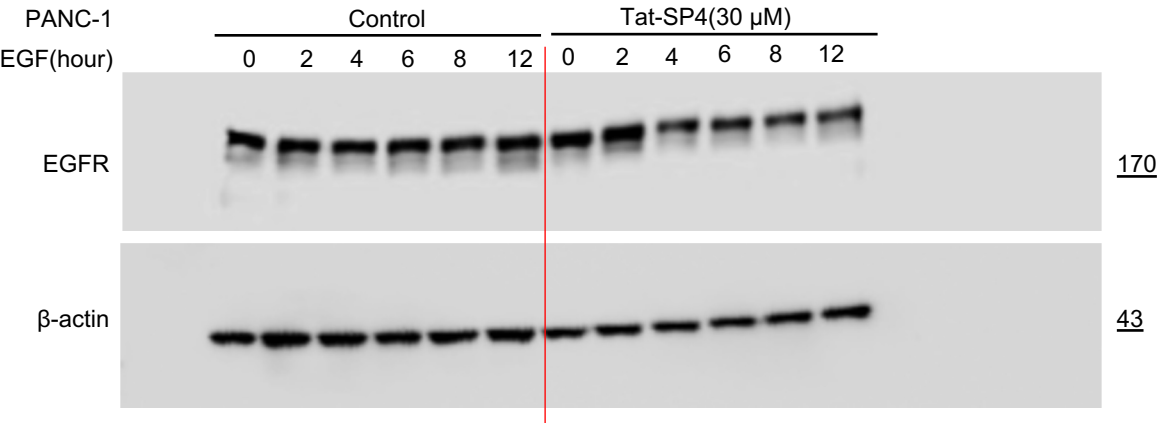

Trial 2

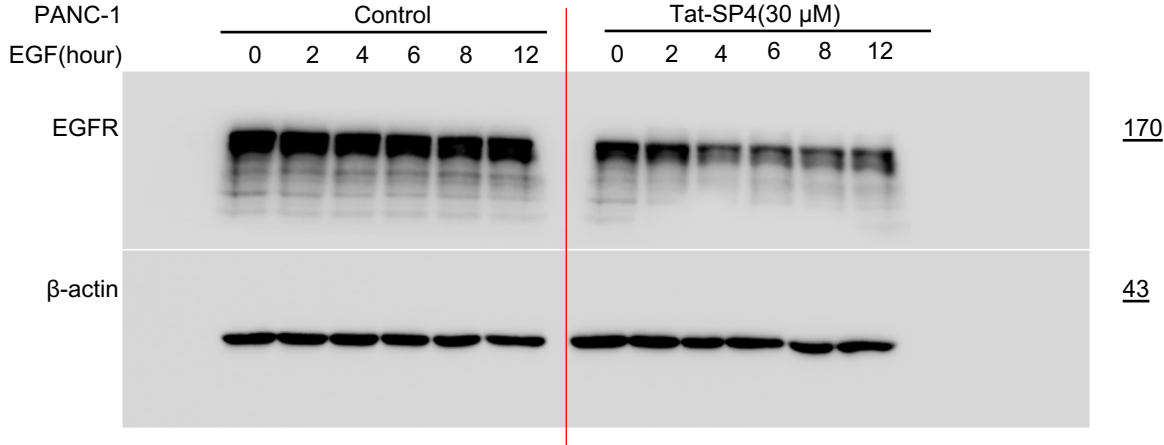

Trial 3

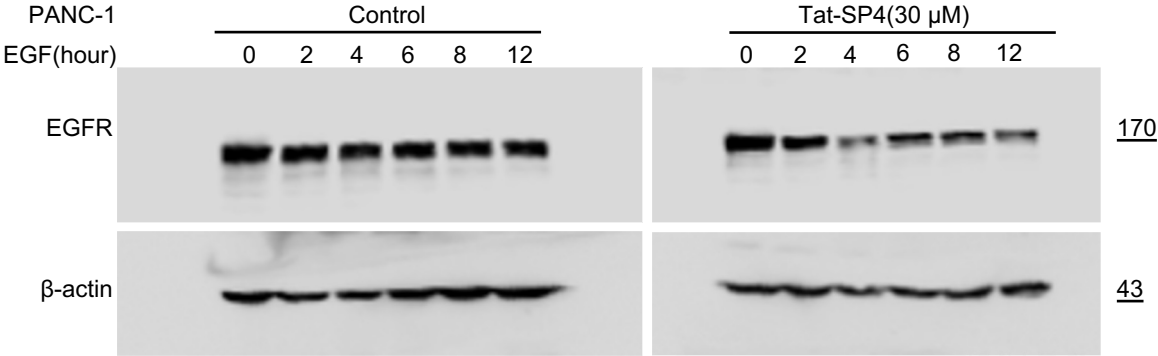

Supplement: s1 [file s1]
